# Supplementary material
Source: PubMed Central journal article supplement (PMC5827968)

## Supporting Information

### Coordination-Driven Face-Directed Self-Assembly of Trigonal Prisms. Face-Based Conformational Chirality

Douglas C. Caskey,<sup>ξ</sup> Takuya Yamamoto,<sup>†</sup> Chris Addicott,<sup>†</sup> Richard K. Shoemaker,<sup>ξ</sup> Jaroslav Vacek,<sup>ξ,¶</sup> Adam M. Hawkrige,<sup>‡</sup> David C. Muddiman,<sup>‡</sup> Gregg S. Kottas,<sup>ξ</sup> Josef Michl<sup>\*,ξ,¶</sup> and Peter J. Stang<sup>\*,†</sup>

<sup>†</sup> *Department of Chemistry, University of Utah, 315 South 1400 East, Rm. 2020, Salt Lake City, Utah 84112*

<sup>‡</sup> *W. M. Keck FT-ICR Mass Spectrometry Laboratory, Department of Chemistry, North Carolina State University, Raleigh, North Carolina 27695*

<sup>ξ</sup> *Department of Chemistry and Biochemistry, University of Colorado, Boulder, Colorado 80309-0215*

<sup>¶</sup> *Institute of Organic Chemistry and Biochemistry, Academy of Sciences of the Czech Republic, 166 10 Prague 6, Czech Republic*

stang@chem.utah.edu, michl@eefus.colorado.edu

|                                                                       |          |
|-----------------------------------------------------------------------|----------|
| <b>Figure S1</b> <sup>31</sup> P NMR spectrum of <b>3a</b> .          | Page S2  |
| <b>Figure S2</b> <sup>1</sup> H NMR spectrum of <b>3a</b> .           | Page S3  |
| <b>Figure S3</b> Infrared spectrum of <b>3a</b> in KBr.               | Page S4  |
| <b>Figure S4</b> <sup>31</sup> P NMR spectrum of <b>3b</b> .          | Page S5  |
| <b>Figure S5</b> <sup>1</sup> H NMR spectrum of <b>3b</b> .           | Page S6  |
| <b>Figure S6</b> Infrared spectrum of <b>3b</b> in KBr.               | Page S7  |
| <b>Figure S7</b> <sup>31</sup> P NMR spectrum of <b>3c</b> .          | Page S8  |
| <b>Figure S8</b> <sup>1</sup> H NMR spectrum of <b>3c</b> .           | Page S9  |
| <b>Figure S9</b> Infrared spectrum of <b>3c</b> in KBr.               | Page S10 |
| <b>Figure S10</b> <sup>31</sup> P NMR spectrum of <b>3d</b> .         | Page S11 |
| <b>Figure S11</b> <sup>1</sup> H NMR spectrum of <b>3d</b> .          | Page S12 |
| <b>Figure S12</b> Infrared spectrum of <b>3d</b> in KBr.              | Page S13 |
| <b>Figure S13</b> DNMR of <b>3a</b> .                                 | Page S14 |
| <b>Figure S14</b> DNMR of <b>3b</b> .                                 | Page S15 |
| <b>Figure S15</b> DNMR of <b>3c</b> .                                 | Page S16 |
| <b>Figure S16</b> DNMR of <b>3d</b> .                                 | Page S17 |
| <b>Figure S17</b> 1D EXCHSY (DPFGSE) chemical exchange of <b>3b</b> . | Page S18 |
| <b>Figure S18</b> 2D-EXCHSY/ROESY of <b>3b</b> .                      | Page S19 |

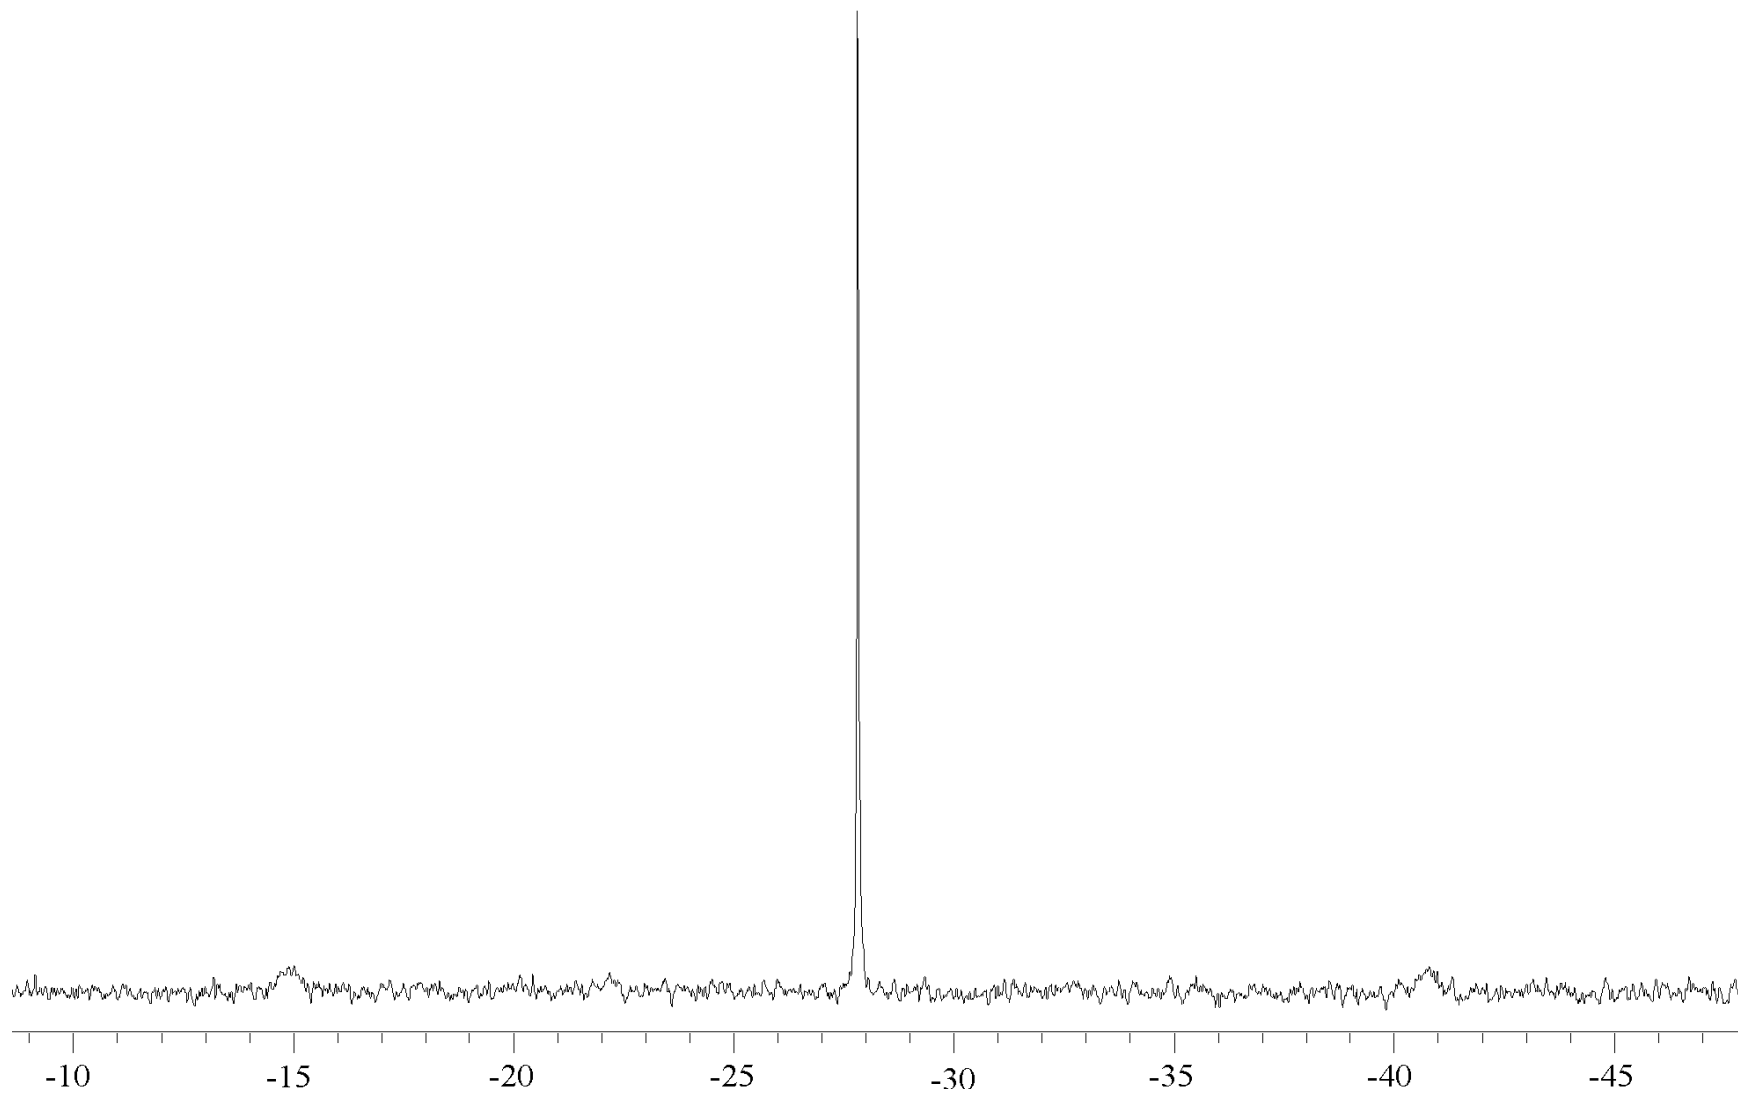

**Figure S1.**  $^{31}\text{P}$  NMR spectrum of **3a**.

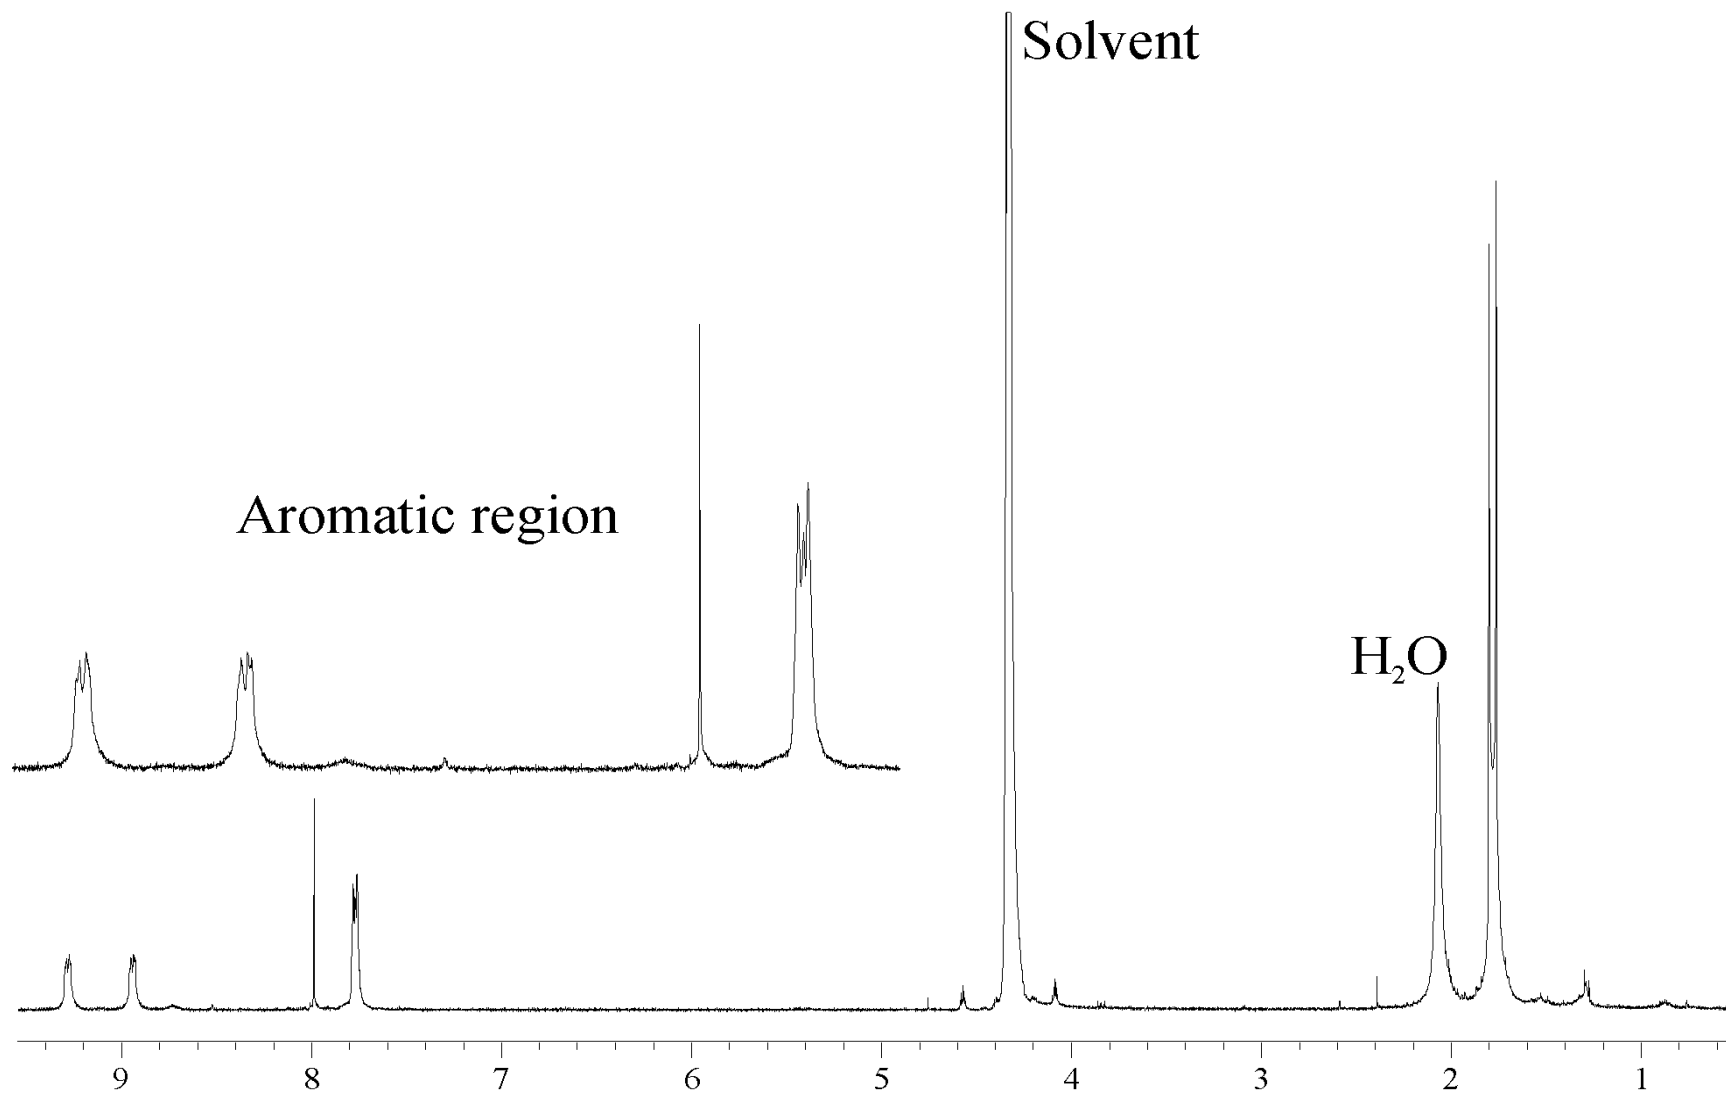

Figure S2.  $^1\text{H}$  NMR spectrum of **3a**.

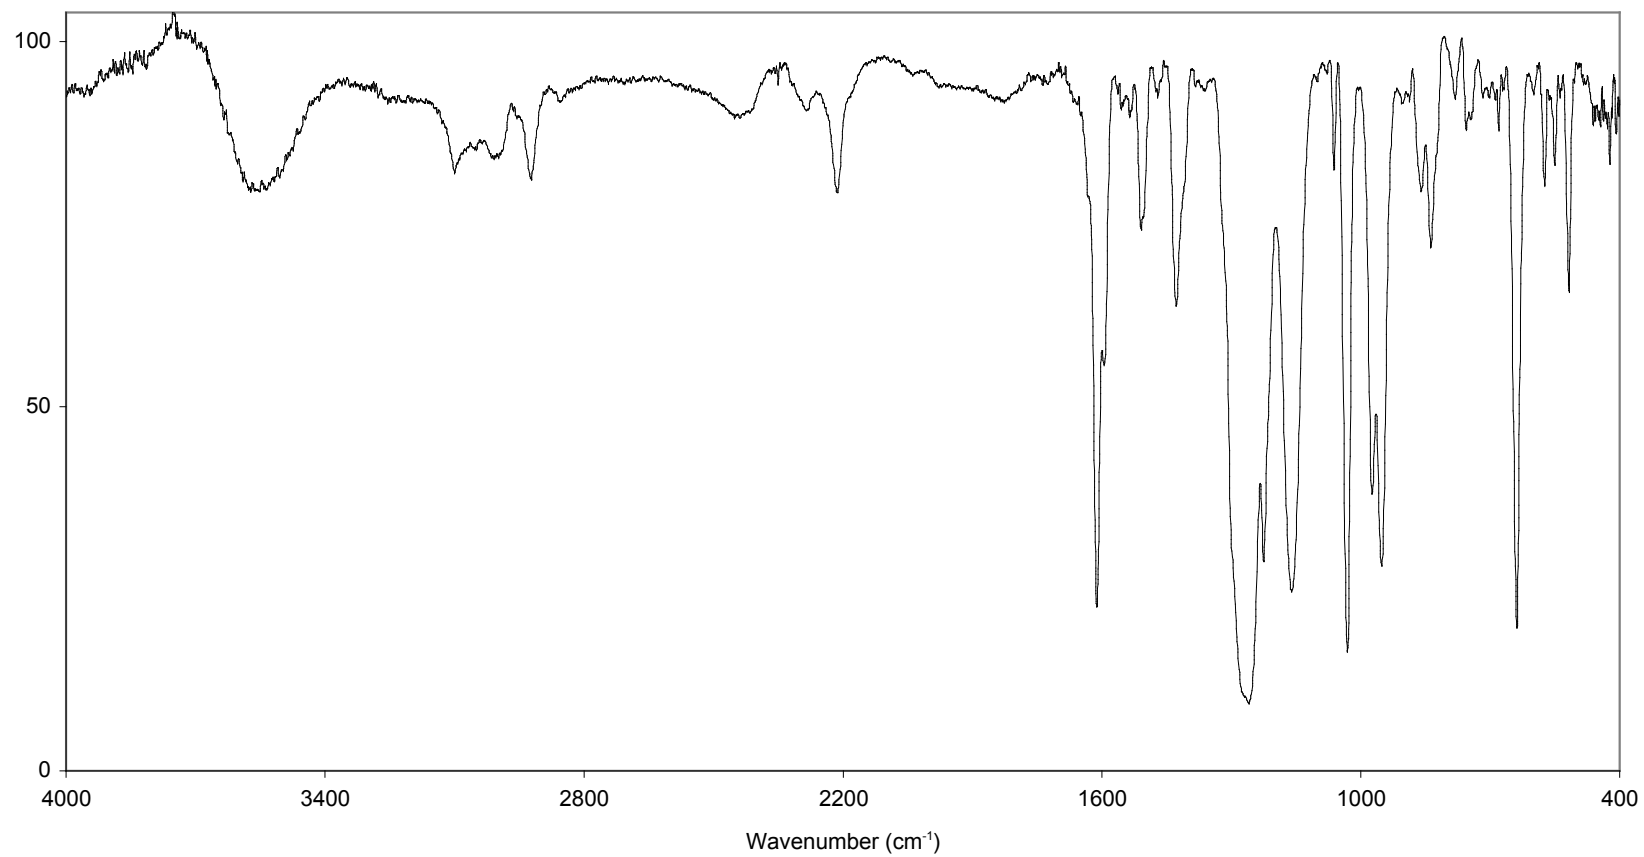

**Figure S3.** Infrared spectrum of **3a** in KBr.

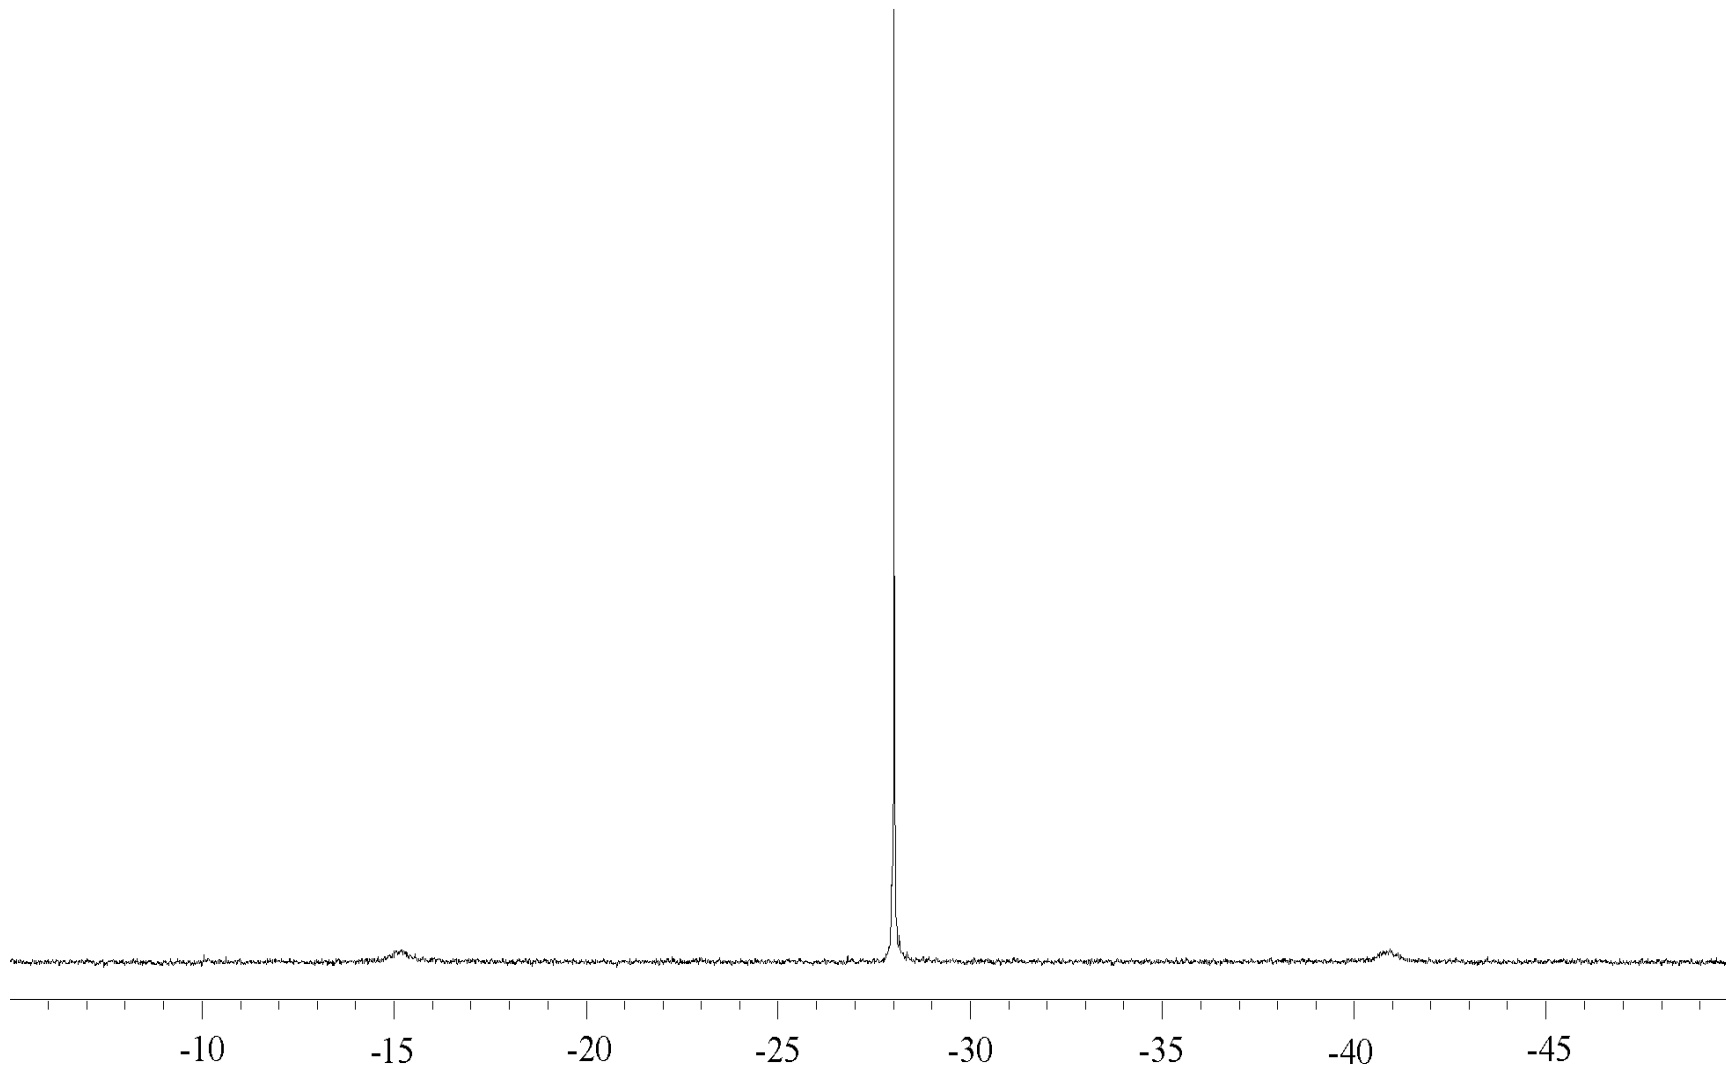

**Figure S4.**  $^{31}\text{P}$  NMR spectrum of **3b**.

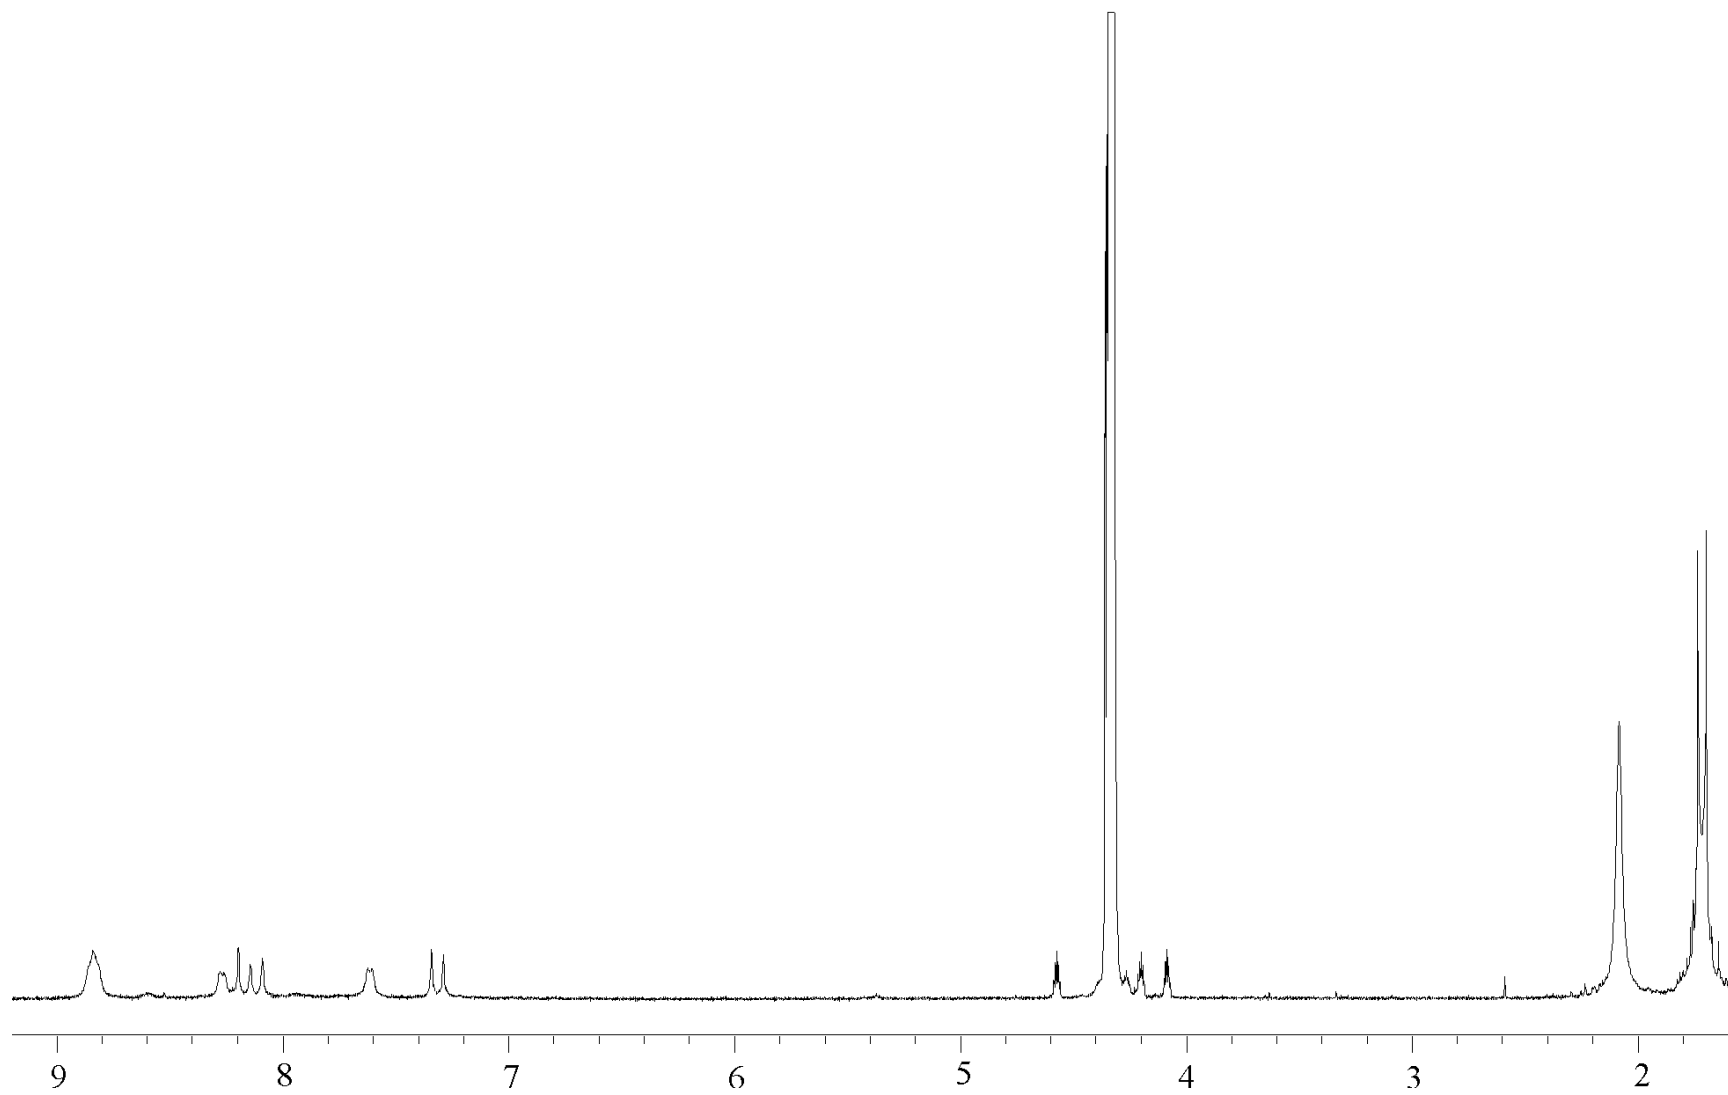

**Figure S5.**  $^1\text{H}$  NMR spectrum of **3b**.

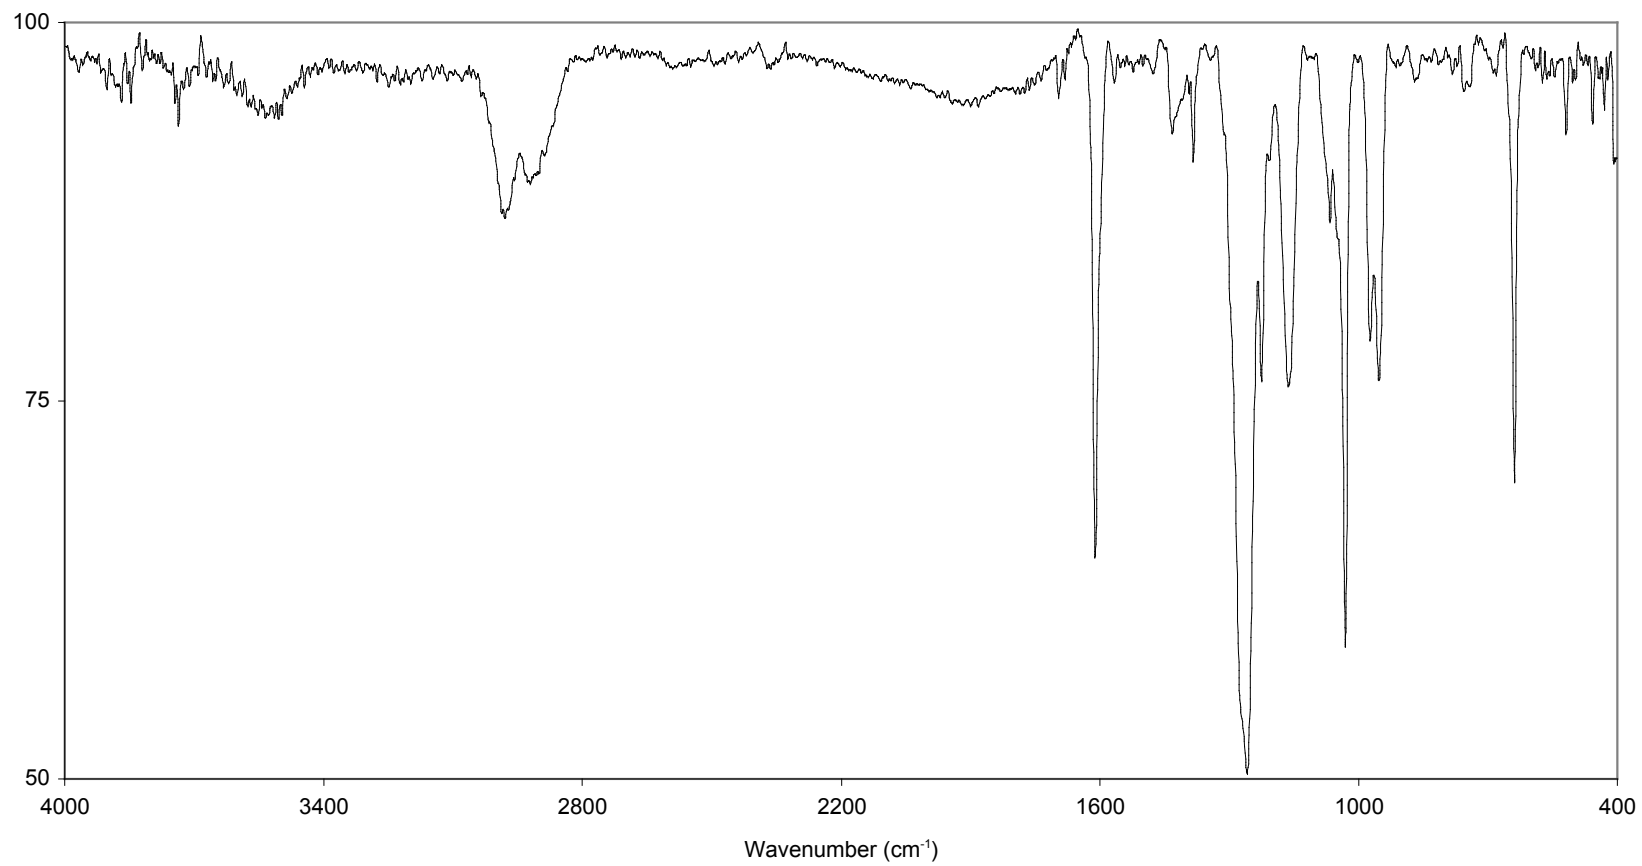

**Figure S6.** Infrared spectrum of **3b** in KBr.

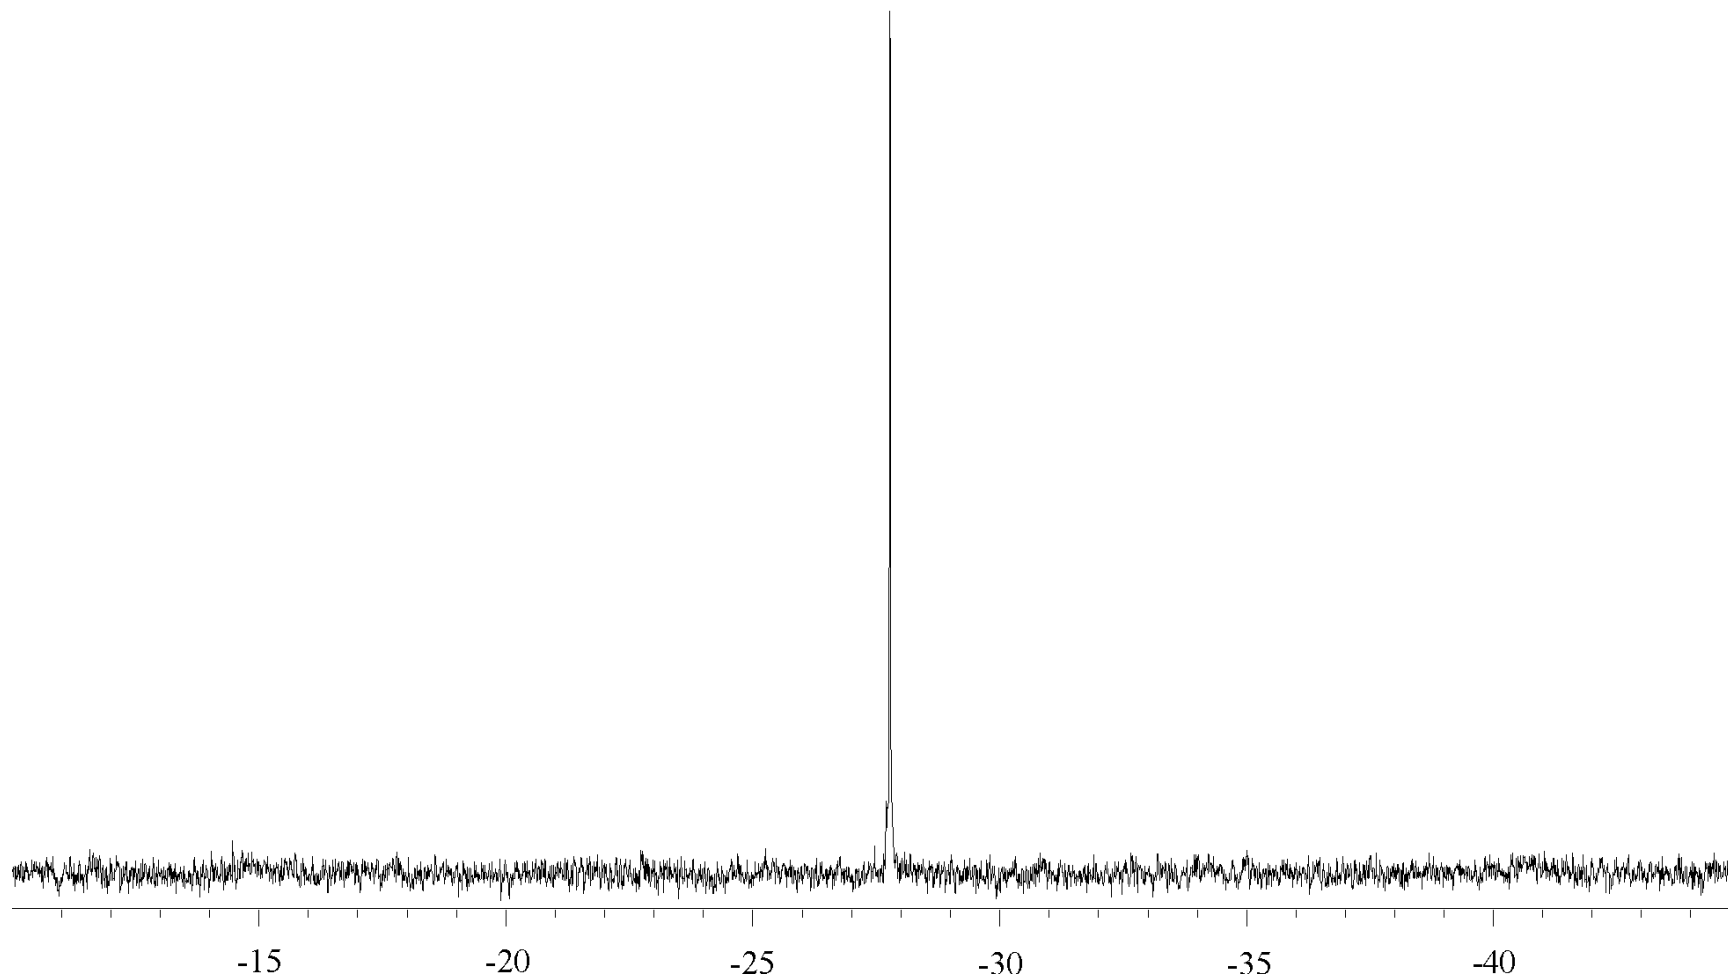

**Figure S7.**  $^{31}\text{P}$  NMR spectrum of **3c**.



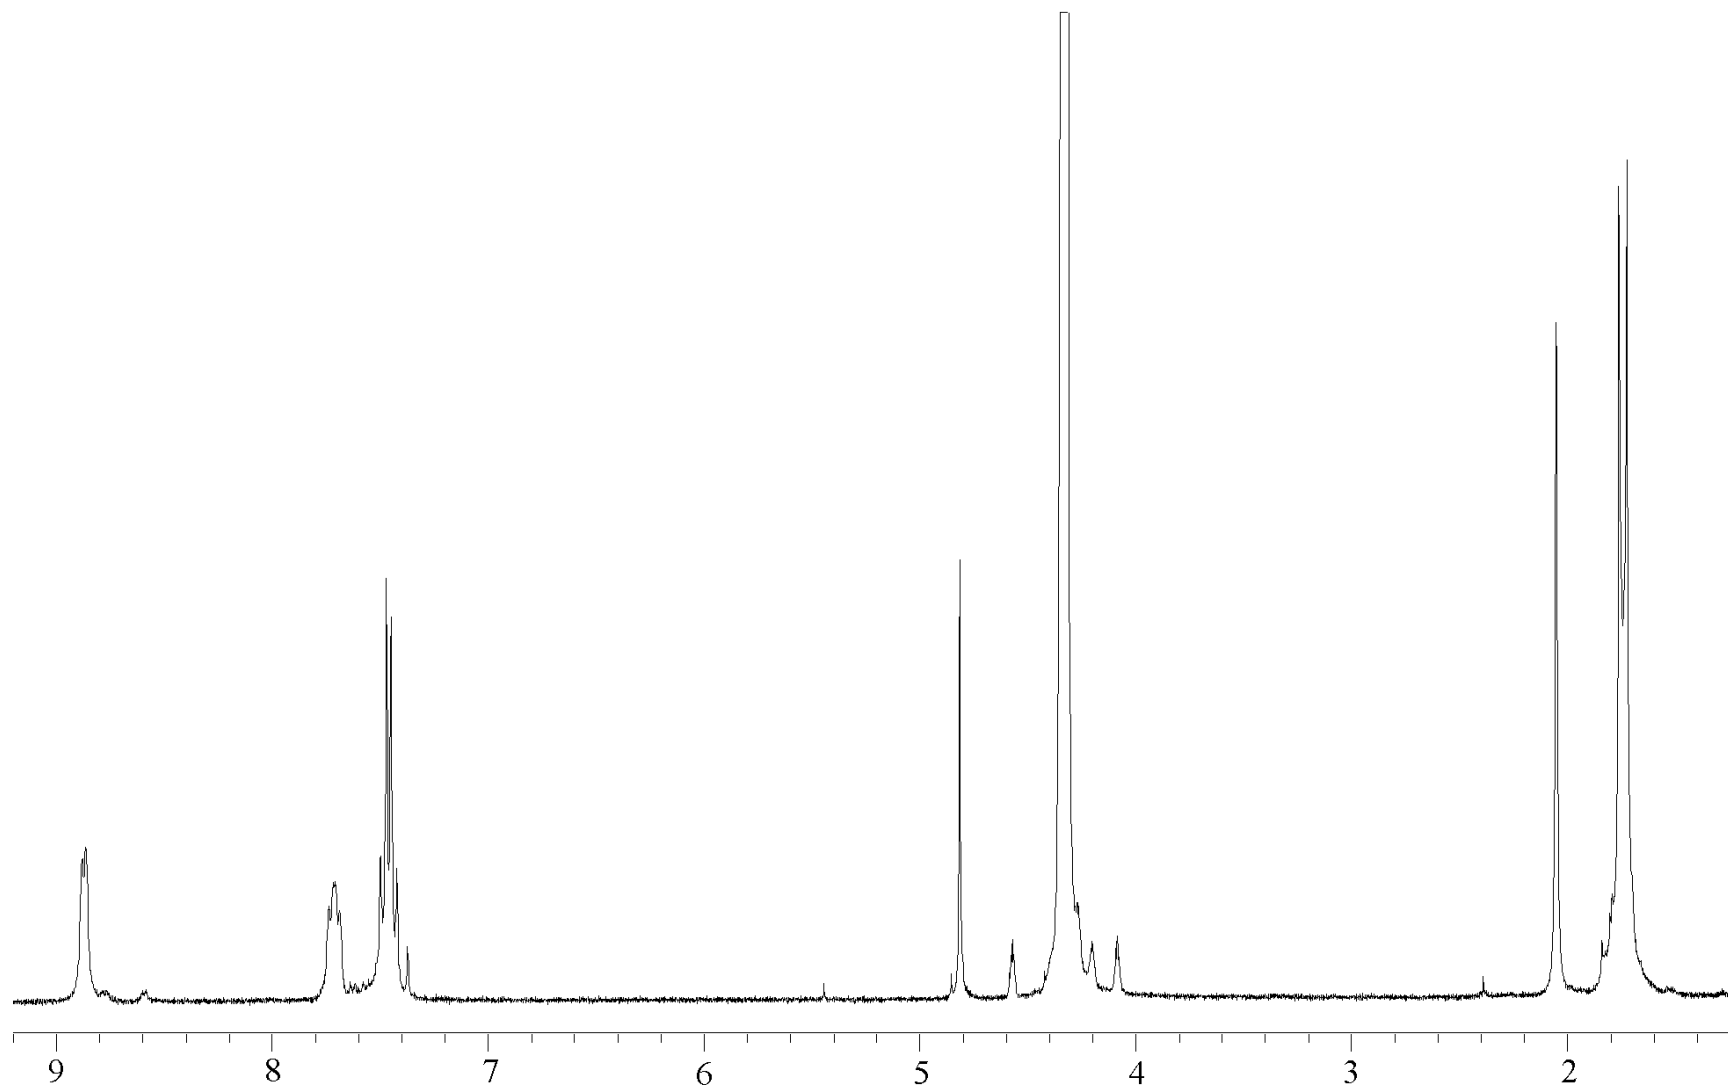

**Figure S8.**  $^1\text{H}$  NMR spectrum of **3c**.

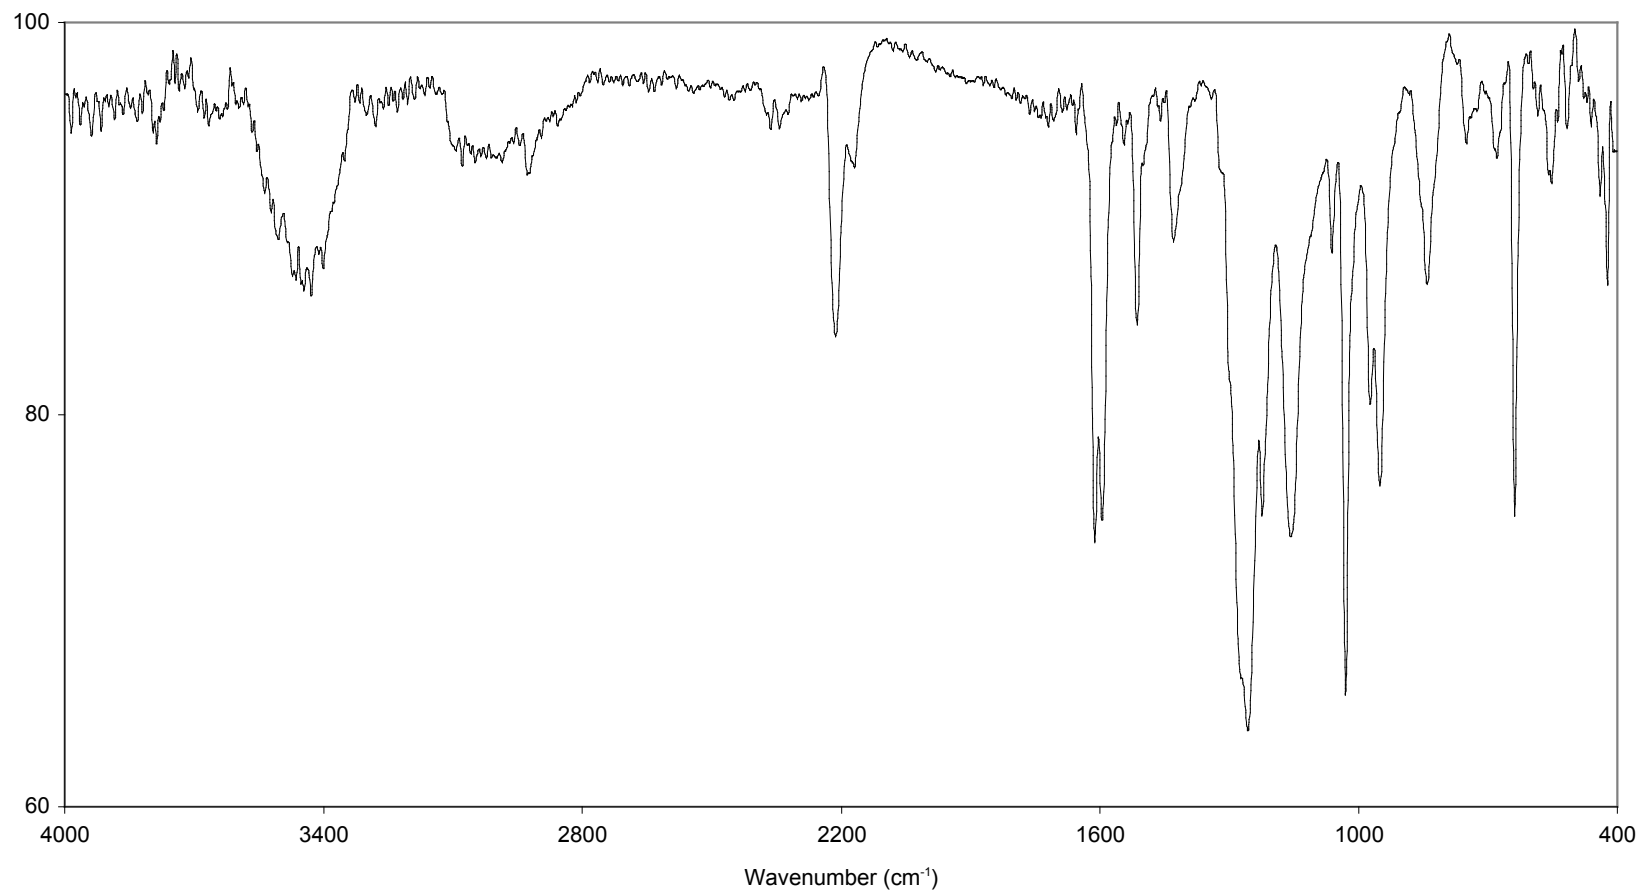

**Figure S9.** Infrared spectrum of **3c** in KBr.

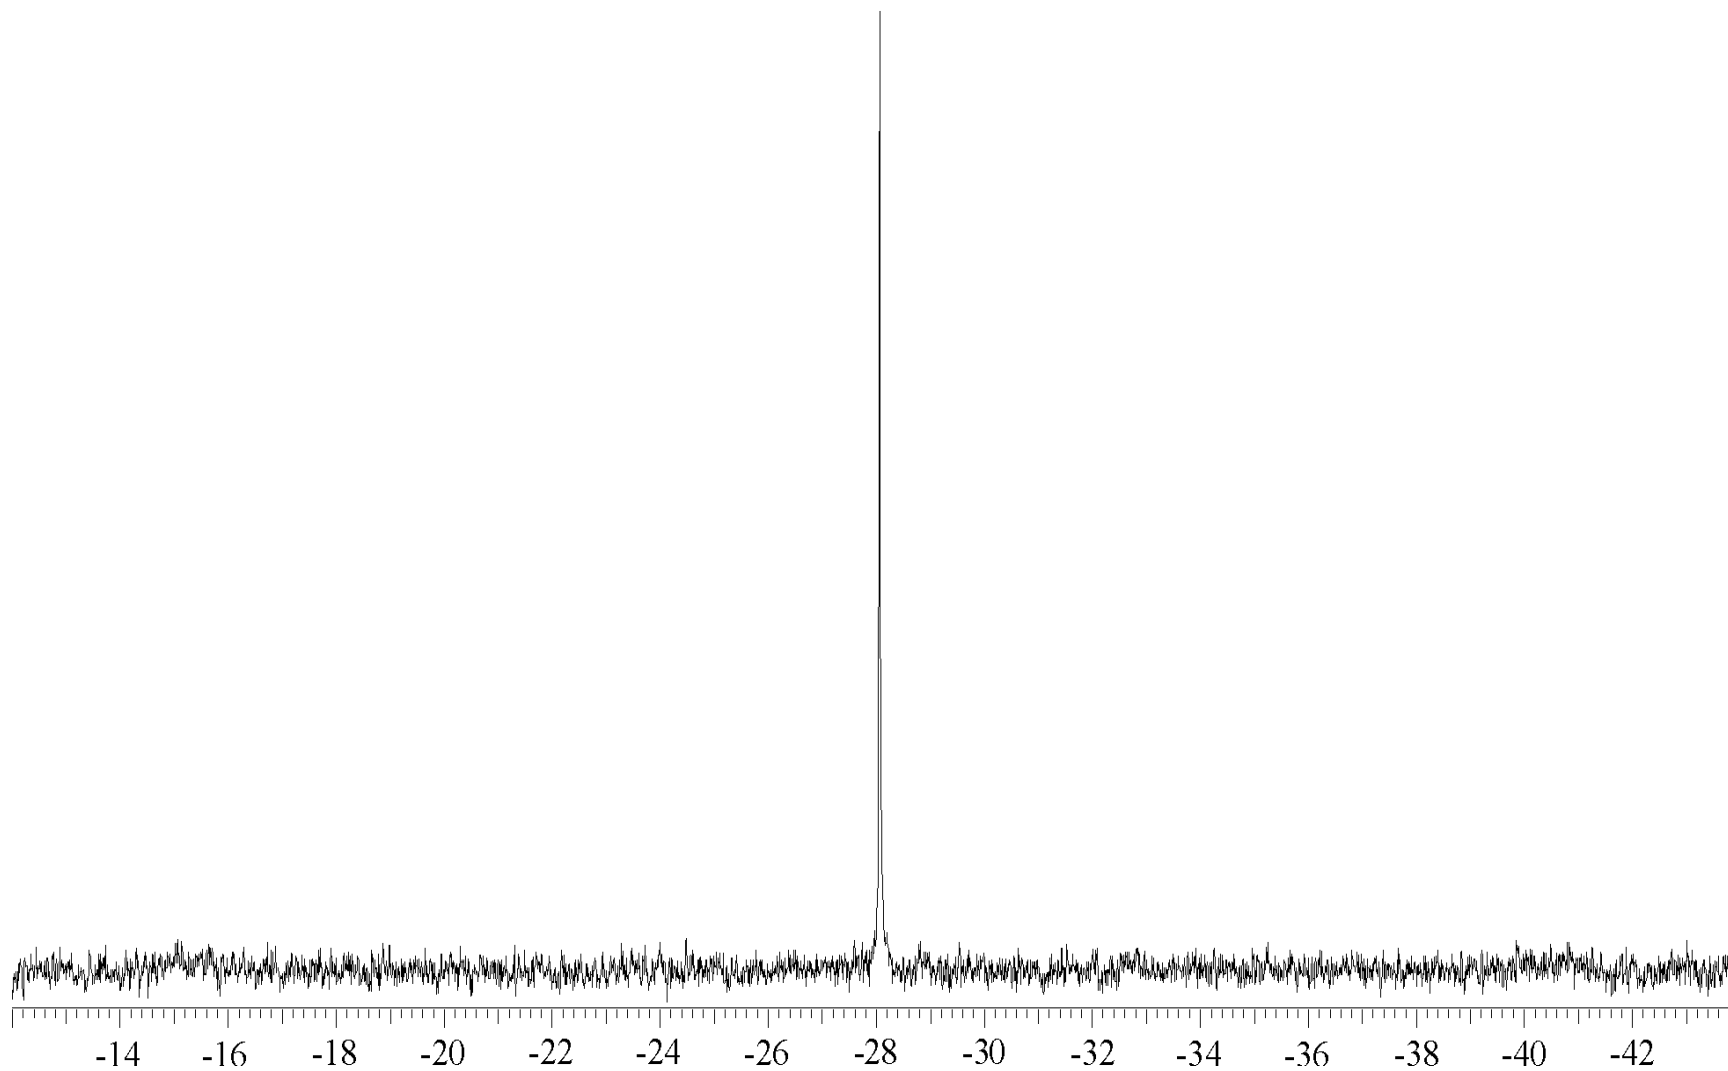

**Figure S10.**  $^{31}\text{P}$  NMR spectrum of **3d**.

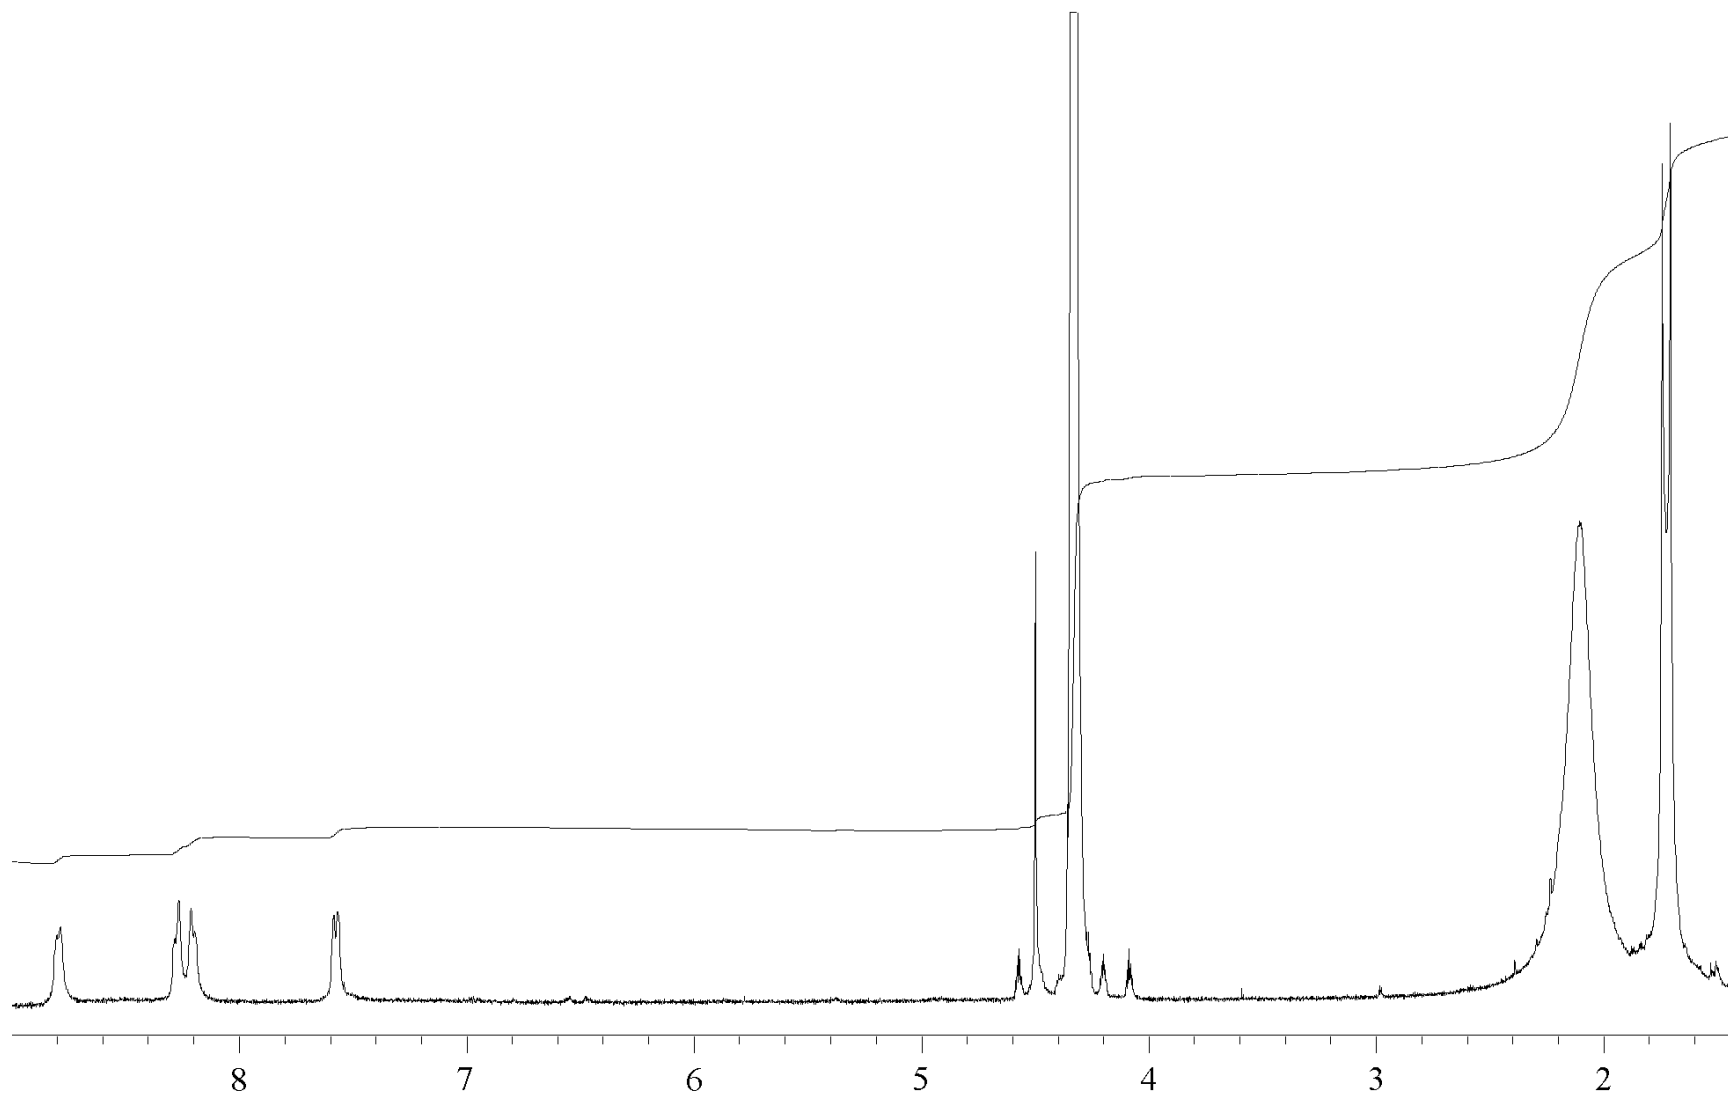

**Figure S11.**  $^1\text{H}$  NMR spectrum of **3d**.

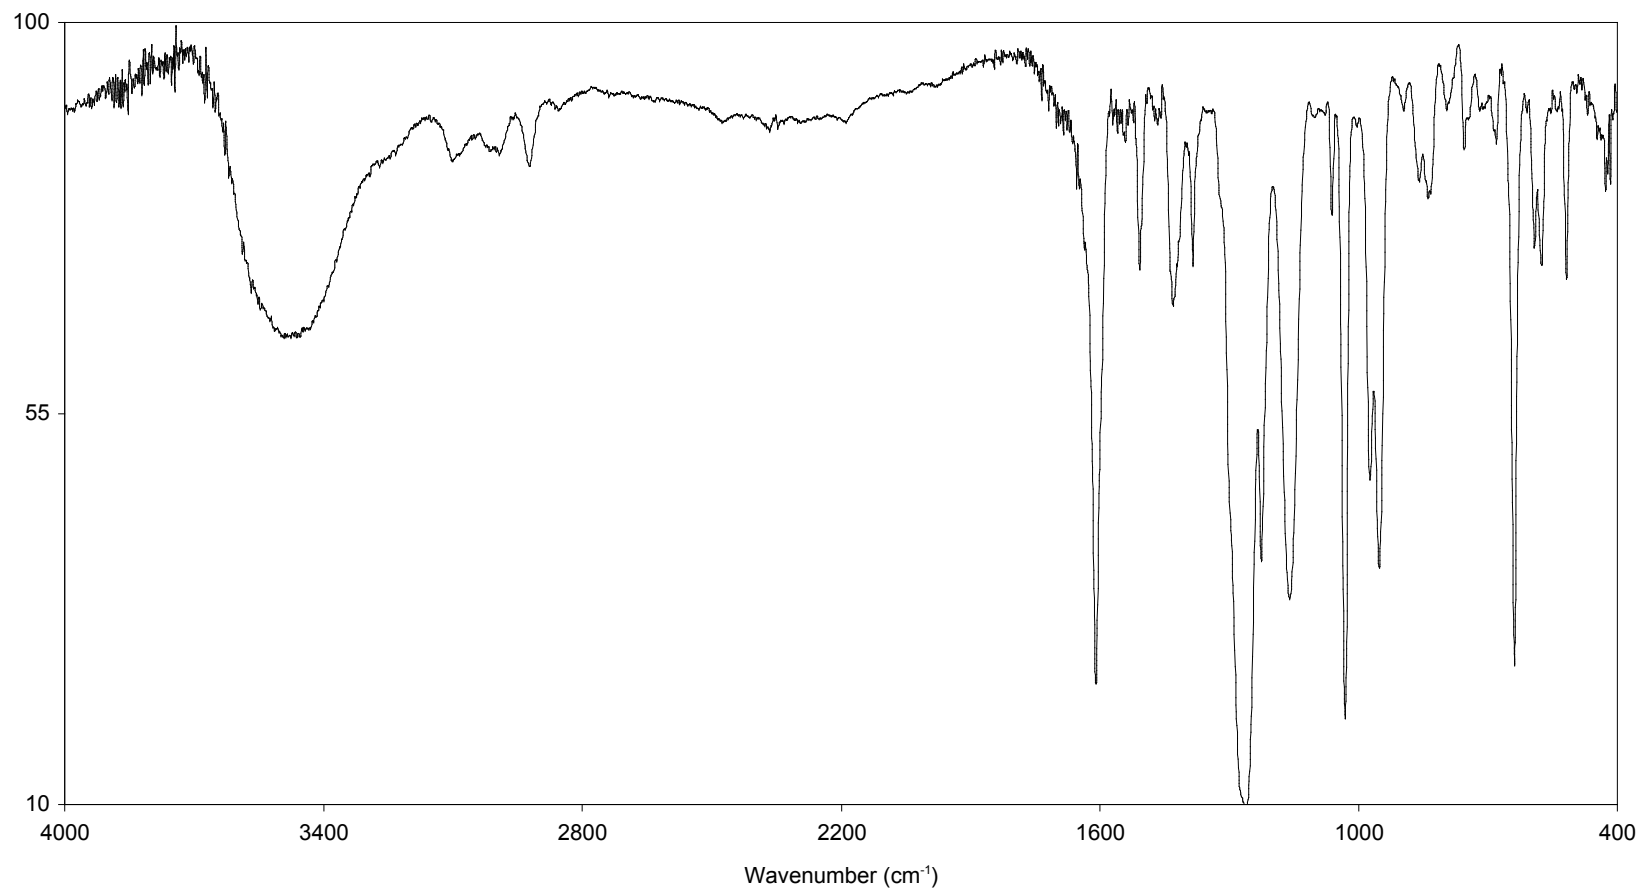

**Figure S12.** Infrared spectrum of **3d** in KBr.

Figure S13. DNMR of **3a**

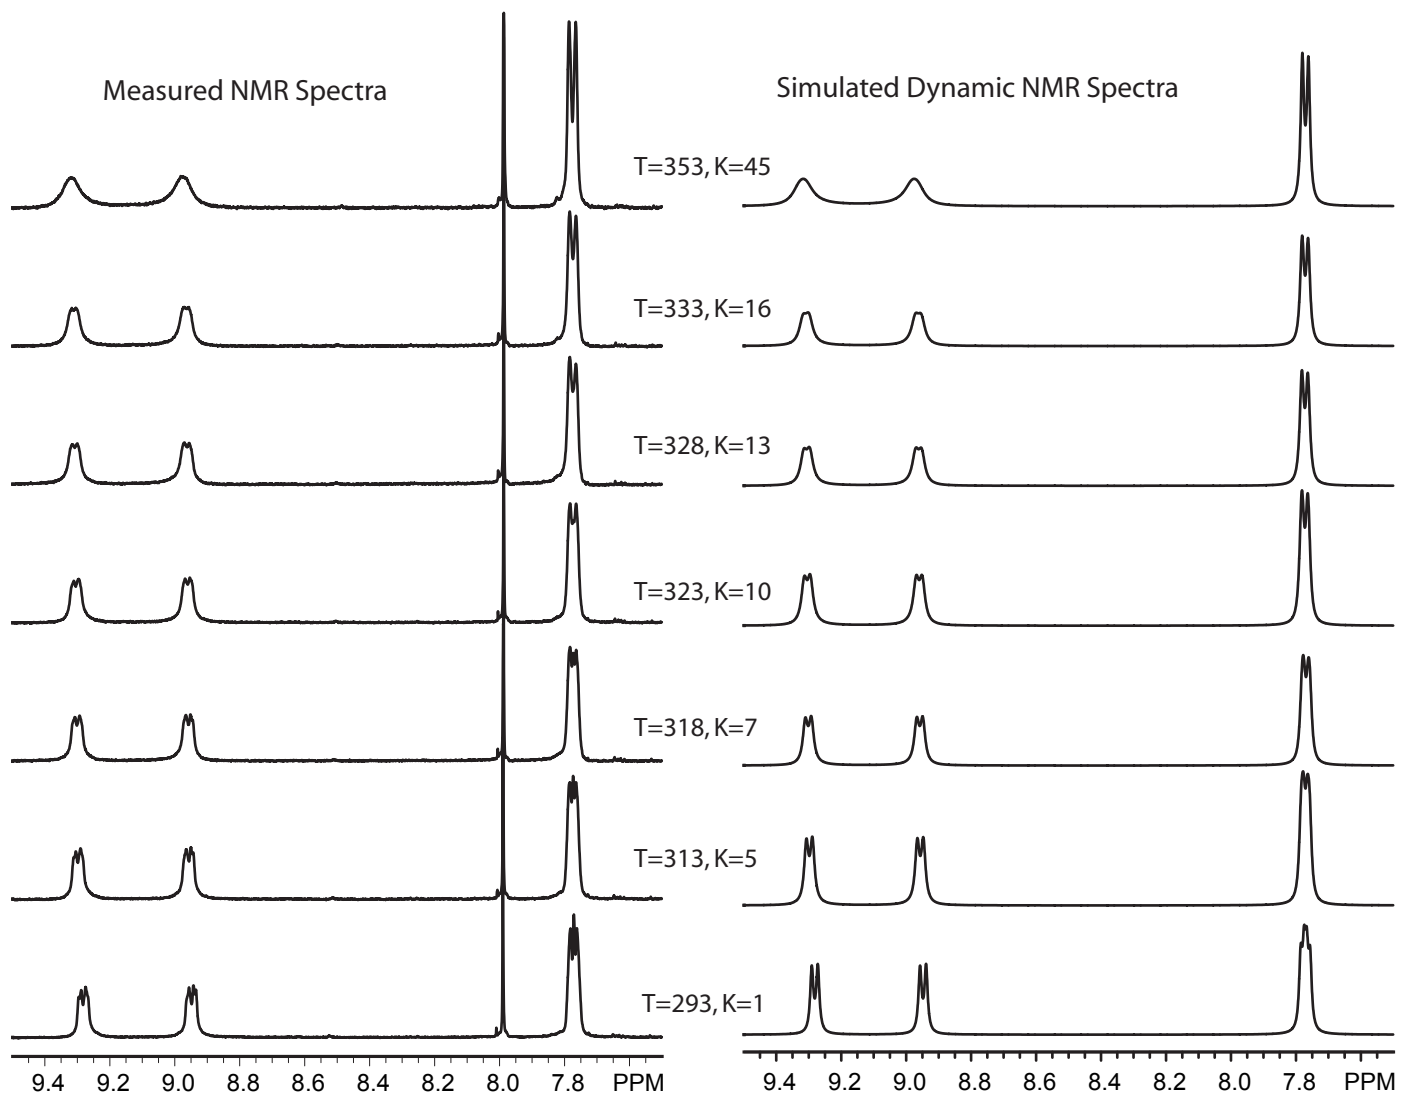

Figure S14. DNMR of **3b**

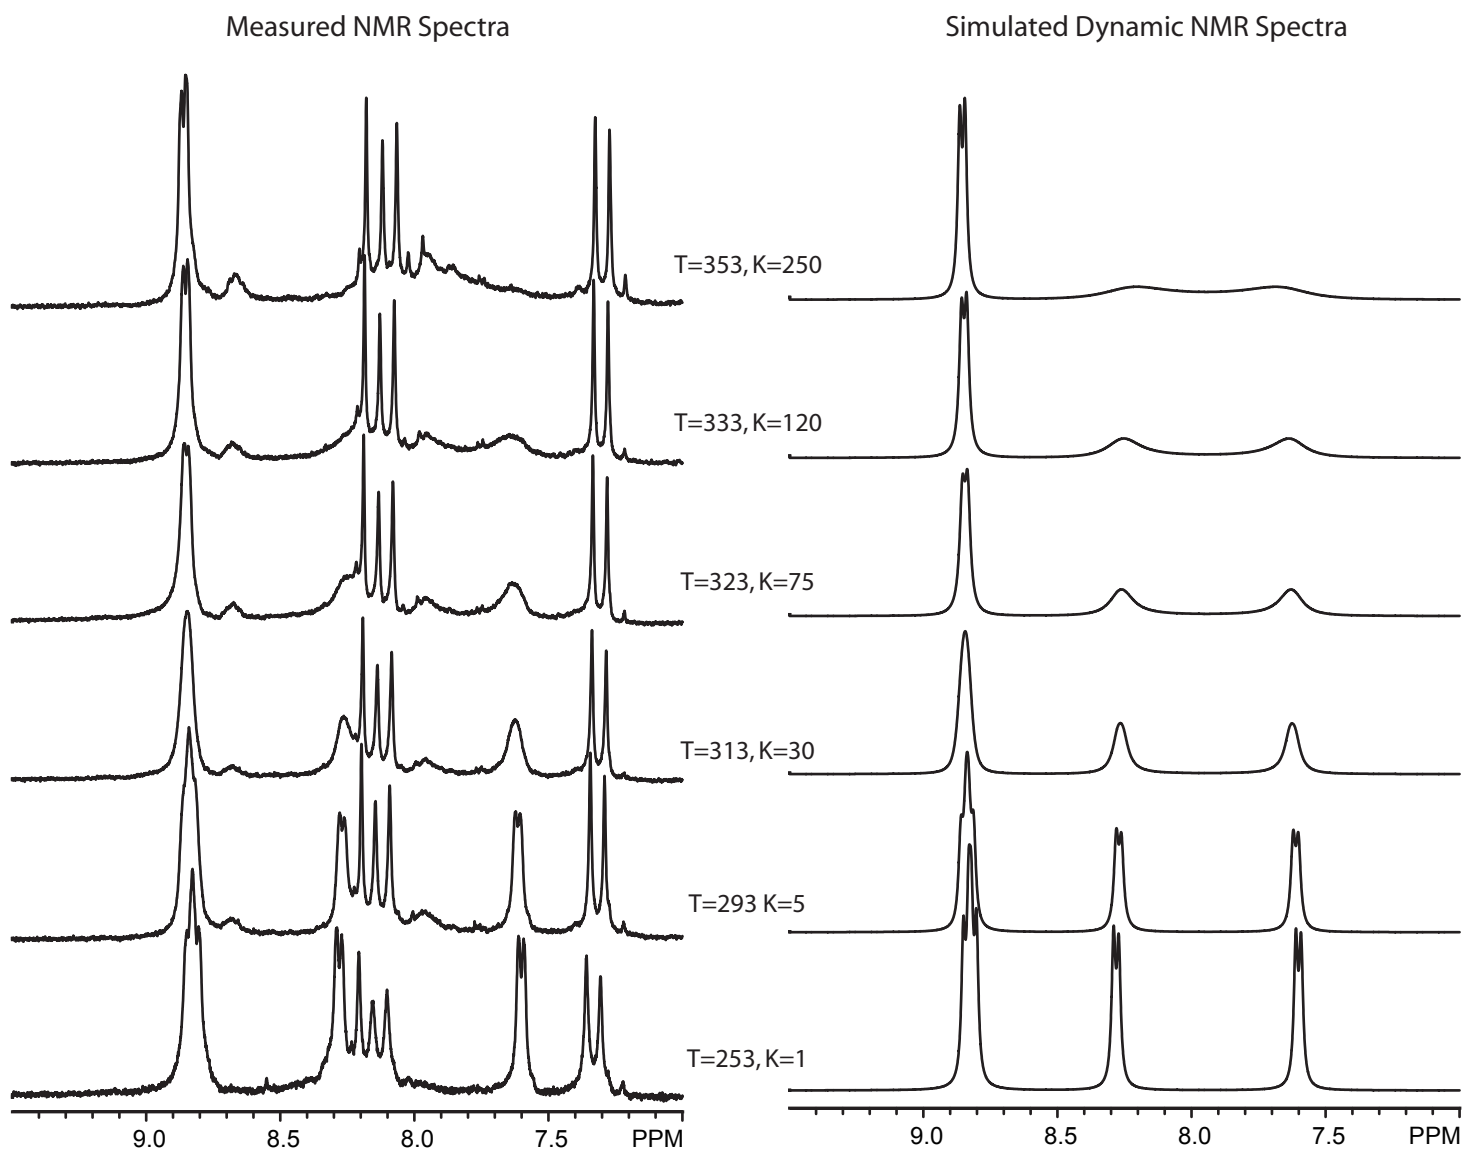

Figure S15. DNMR of **3c**

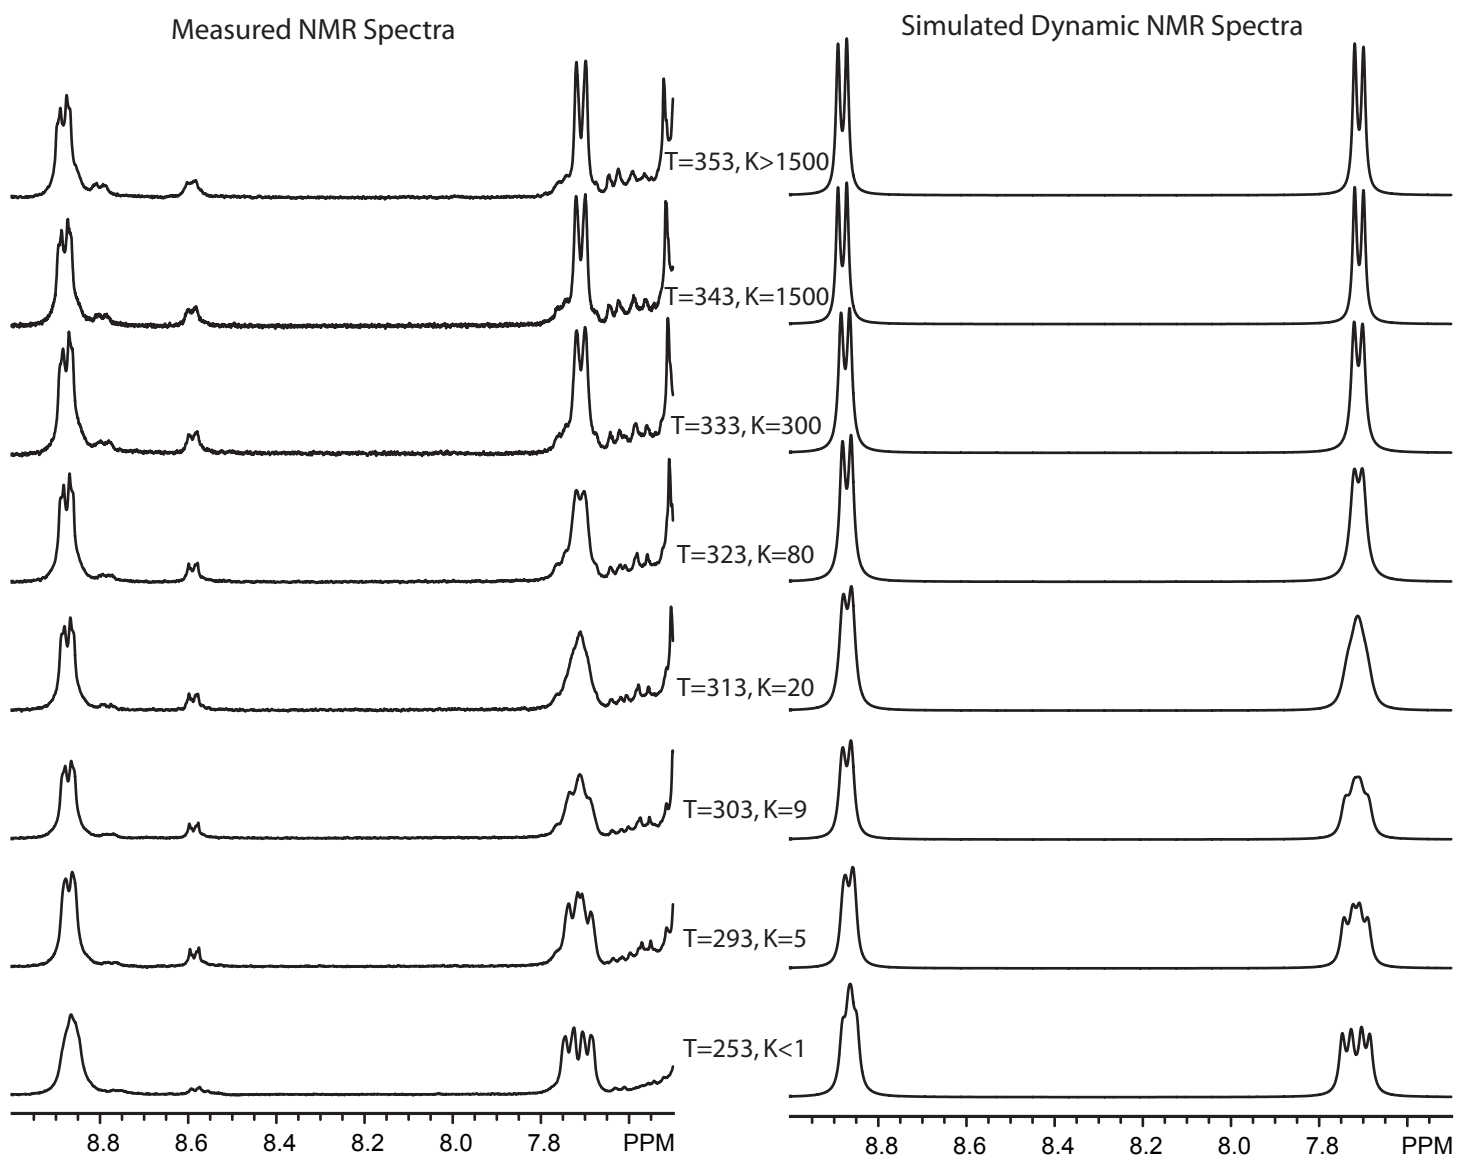



Figure 16. DNMR of **3d**

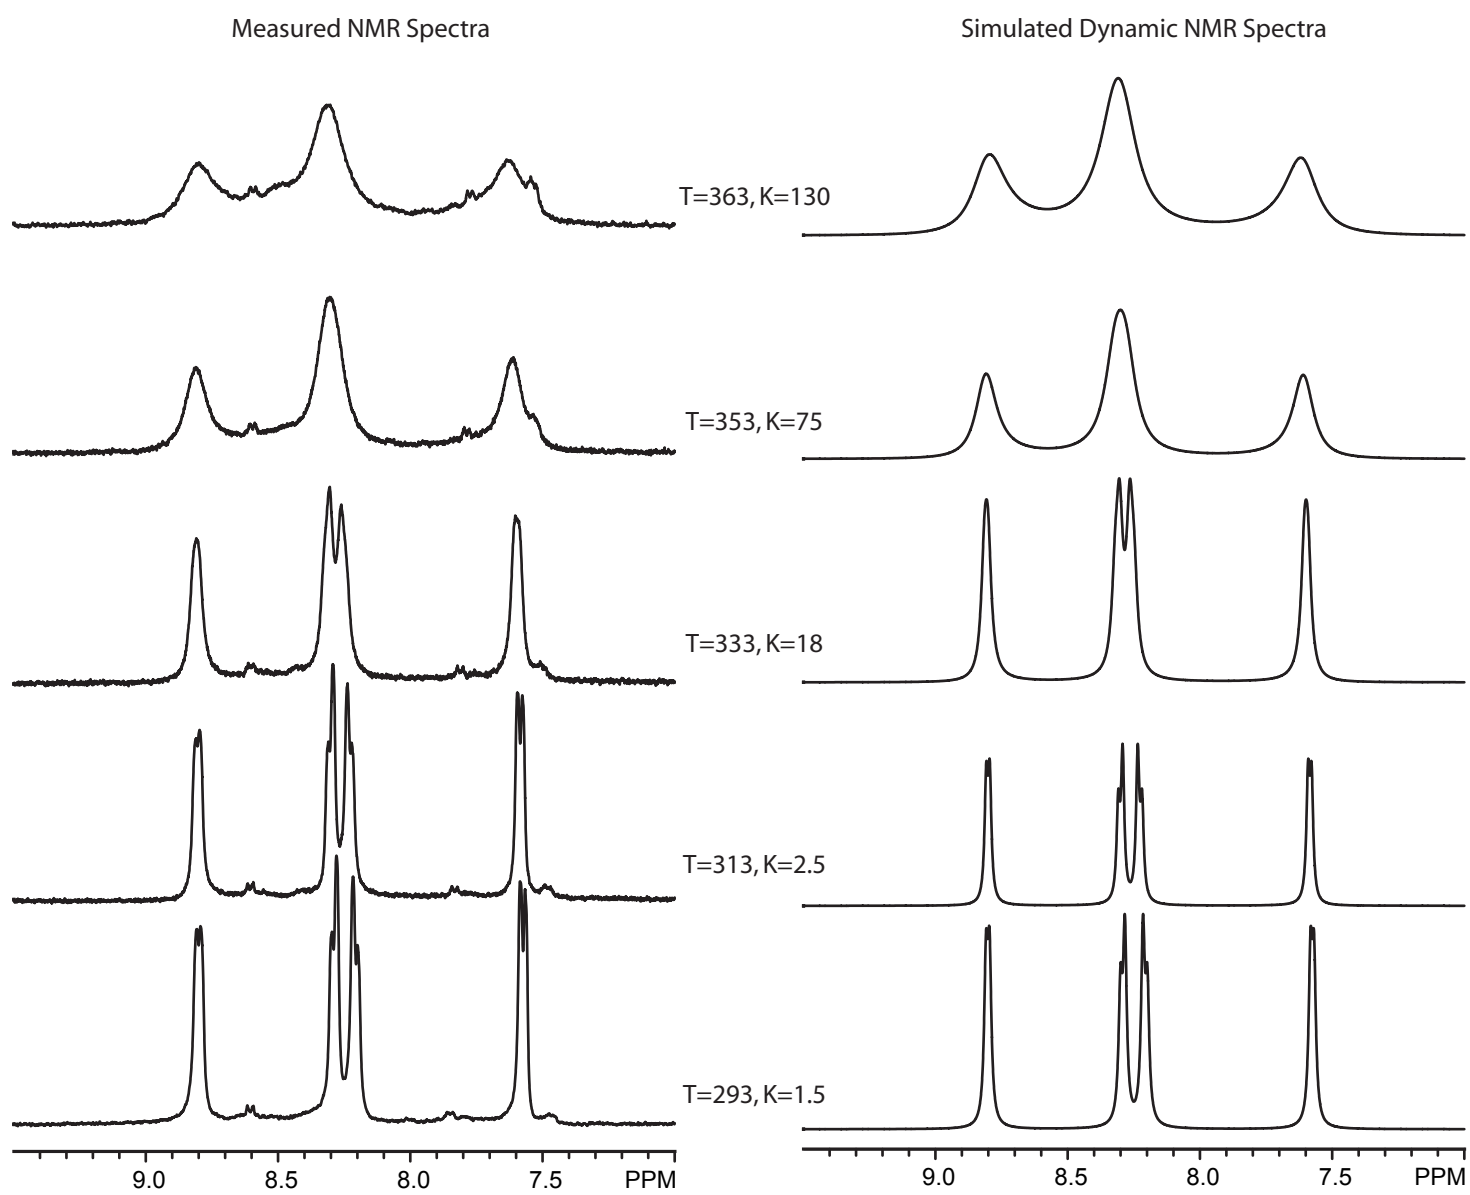

Figure S17. 1D EXCHSY (DPFGSE) chemical exchange of **3b**:

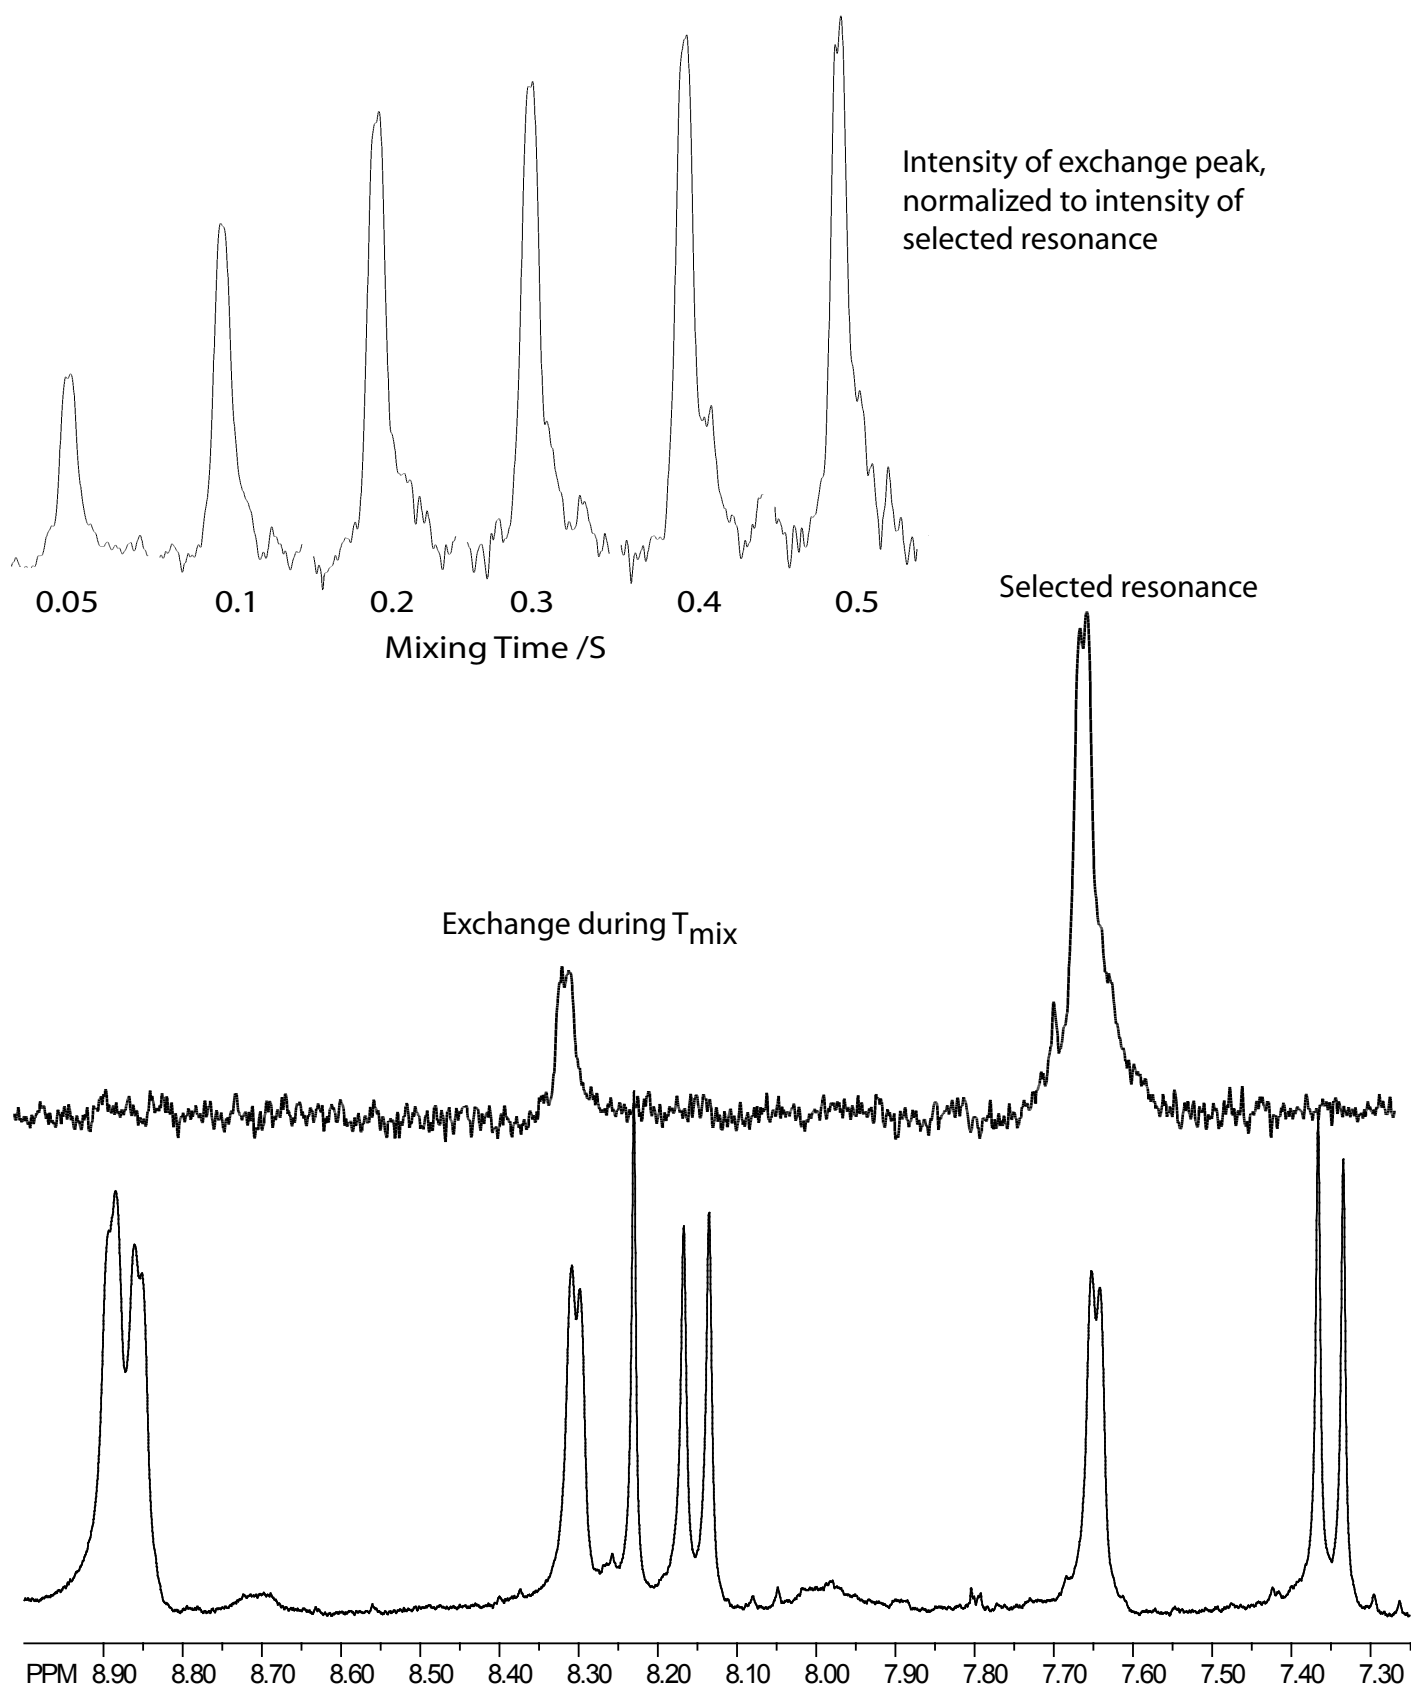

Figure S18. 2D-EXCHSY/ROESY of **3b**

UCB Varian Inova-500

Pulse Sequence: ROESY

Solvent: Nitromethane

File: 3b-1H\_T20-ROESY

Relax. delay 1.000 sec

Mixing 0.200 sec

Acq. time 0.112 sec

Width 4567.3 Hz

2D Width 4567.3 Hz

8 repetitions

2 x 64 increments

OBSERVE H1, 500.3688803 MH

DATA PROCESSING

Gauss apodization 0.052 sec

F1 DATA PROCESSIN

Gauss apodization 0.008 sec

FT size 2048 x 2048

2D-EXCHSY / ROESY

Black cross peaks from exchange

Red cross peaks are NOE correlations

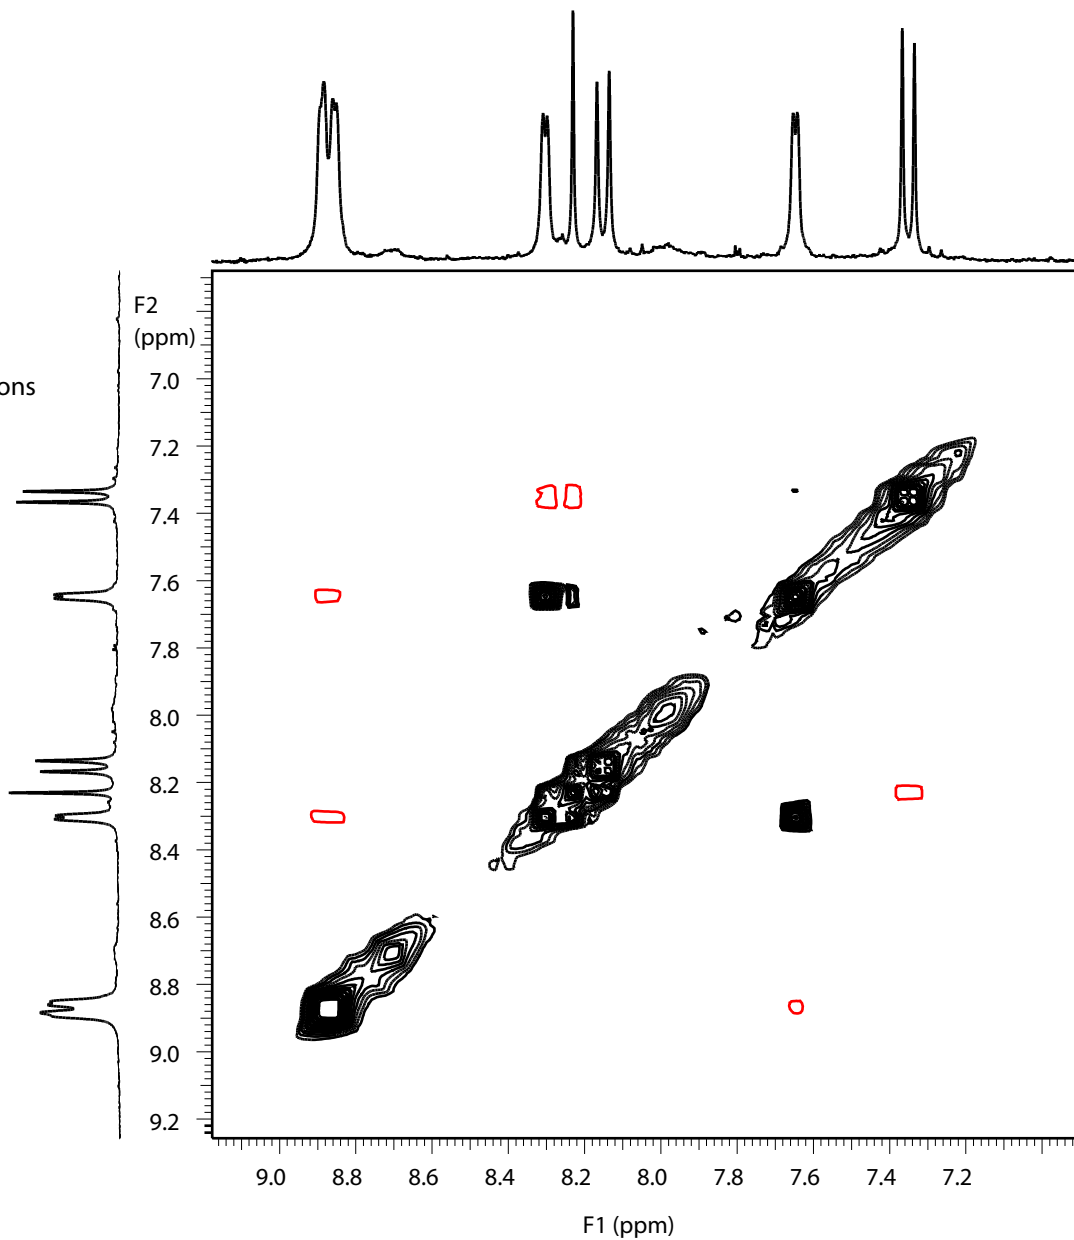

Supplement: NIHMS711595-supplement-1.pdf [file NIHMS711595-supplement-1.pdf]
